1 **Parvovirus B19 genomic DNA concentrations in wastewater solids are associated with**  
2 **community infections**

3  
4  
5 **Alessandro Zulli<sup>1,2</sup> (ORCID 0000-0003-3636-0211) Rebecca Y. Linfield<sup>2</sup>, Dorothea Duong<sup>3</sup>,**  
6 **Bridgette Shelden<sup>3</sup>, Alexandria B. Boehm<sup>1\*</sup> (ORCID 0000-0002-8162-5090)**

7  
8 1. Department of Civil and Environmental Engineering, Stanford University, 473 Via Ortega,  
9 Stanford, California, 94305

10 2. Division of Infectious Diseases and Geographic Medicine, Department of Medicine, Stanford  
11 University, 300 Pasteur Drive, Stanford, California, 94305

12 3. Verily Life Sciences LLC, South San Francisco, CA, USA

13  
14 \* Corresponding author: [aboehm@stanford.edu](mailto:aboehm@stanford.edu)

15  
16 **Abstract**

17  
18 We assessed concentrations of parvovirus B19 DNA from two wastewater treatment plants in a  
19 county with a known outbreak in 2024. Wastewater viral concentrations correlated significantly  
20 with clinical cases, demonstrating wastewater's potential for tracking parvovirus B19 infections.  
21 Peaks in wastewater concentrations were aligned with the peak in hydrops fetalis diagnoses.

22  
23 **Introduction**

24  
25 Parvovirus B19 is a single-stranded DNA virus transmitted through respiratory droplets. In 2024  
26 infections increased significantly across the United States, with seroprevalences in children  
27 rising from below 3% in 2020-2022 to 24.9% in 2024<sup>1</sup> It typically causes a mild "slapped cheek"  
28 rash in children, but can lead to serious complications in pregnant women, including hydrops  
29 fetalis and fetal death.<sup>2-4</sup> Individuals infected with the virus, particularly those who are  
30 immunocompromised, are at risk of developing aplastic anemia.<sup>3,5</sup>

31  
32 Parvovirus B19 is highly infectious, with an estimated  $R_0$  of 8, and studies have shown that 20-  
33 50% of susceptible people are infected during outbreaks in schools.<sup>6,7</sup> There is no vaccine  
34 available, and limited treatment options, meaning prevention and early detection are crucial.<sup>1,4,8</sup>  
35 However, parvovirus B19 infection is not a notifiable condition to public health authorities in the  
36 U.S.<sup>6</sup> Wastewater based epidemiology has been shown to be an effective, real-time, and low-  
37 cost method of generating epidemiological data for a variety of human pathogens, suggesting  
38 potential utility for parvovirus B19.<sup>9,10</sup>

39  
40 This study aimed to evaluate whether wastewater surveillance can track parvovirus B19  
41 infections by analyzing samples from two wastewater treatment plants during a known outbreak  
42 in Montgomery, Texas, and comparing results with clinical information from electronic health  
43 records systems.

44  
45  
46 **The Study**

47

48 Twenty-four hour composite raw wastewater influent samples were collected three times per  
49 week between 18 December 2023 and 30 August 2024 from two wastewater treatment plants  
50 serving 65,000 and 70,000 people (WWTP 186 and 187, Figure S1). A total of 220 samples  
51 were collected. From each sample, wastewater solids were collected from the sample using  
52 settling and centrifugation.

53

54 We used a previously validated hydrolysis-probe PCR assay targeting the non-structural protein  
55 1 (NS1) gene of parvovirus B19. Assay specificity and sensitivity were confirmed through in-  
56 silico analysis against reference genomes and in-vitro testing against common respiratory  
57 viruses and bacteria (appendix, Table S1). DNA was extracted from wastewater solids using the  
58 Chemagic Viral DNA/RNA 300 kit followed by column-based PCR inhibitor removal. Viral  
59 concentrations of parvovirus B19 (FAM) and SARS-CoV-2 (HEX) were quantified as a duplex  
60 assay in six replicate wells using digital droplet reverse transcription polymerase chain reaction  
61 (ddPCR, appendix Table S2). We included negative and positive extraction and PCR controls.  
62 The detection limit was approximately 1,000 copies per gram of dry weight (cp/g). Primers and  
63 thermocycling conditions are provided in the appendix, along with further details of various  
64 controls including controls to confirm that storage of samples did not affect nucleic-acid integrity  
65 and measurements of pepper mild mottle virus (PMMoV). Measured concentrations in the  
66 samples are available through the Stanford Digital Repository  
67 (<https://doi.org/10.25740/zn011jk5743>).

68

69 Clinical case and syndromic data was gathered from Epic Cosmos (Epic Cosmos, Epic Systems  
70 Corporation, Wisconsin). First, all encounters in the dataset were geographically and temporally  
71 filtered to encounters within Montgomery County, Texas between 16 October 2023 and 16  
72 October 2024. The county has a total population of 620,443 as of the 2020 census. From this  
73 subset, parvovirus cases and hydrops fetalis diagnoses were identified using grouped  
74 International Classification of Diseases (ICD-10) codes.<sup>11</sup> We identified parvovirus cases using  
75 ICD-10 codes B08.3, B34.3, and B97.6, and hydrops fetalis using codes P56.\*, O36.\*, and  
76 Z36.81. Data was aggregated weekly for parvovirus cases and quarterly for hydrops fetalis  
77 diagnoses, with values <10 redacted.

78

79 Statistical analyses used Kruskal-Wallis tests to compare viral concentrations between plants  
80 and chi-square tests for detection frequencies. We assessed associations between wastewater  
81 concentrations and clinical cases using Kendall's tau correlation. Due to multiple comparisons  
82 (n=11), we used p=0.005 as the significance threshold.

83

84 Parvovirus B19 DNA was detected in 45/111 (40%) of samples from WWTP186 and 62/109  
85 (57%) from WWTP187, with detection frequencies not significantly different (chi-square=5.24,  
86 p=0.02). Concentrations were mostly non-detectable before April, peaked in June and returned  
87 to non-detectable levels by August. Median (interquartile range, IQR) concentrations were 0 (0-  
88 8,071 cp/g) at WWTP186 and 6,121 (0-20,998) copy (cp)/g at WWTP187, showing significant  
89 differences between plants (effect size = 6121 cp/g, p=0.001) even when normalized by PMMoV  
90 ((effect size =  $2.7 \times 10^{-5}$ , p=0.003) .

91  
92 Clinical parvovirus cases in Montgomery County showed similar seasonality, with  $\leq 10$  cases  
93 until April, peaking in June, and declining by August. Weekly viral concentrations correlated  
94 significantly with case counts at both plants (Kendall's tau=0.56 and 0.52, both  $p < 0.0001$ ).  
95 During the quarter of increasing wastewater concentrations, parvovirus cases rose from  $< 10$  to  
96 223, coinciding with an increase to 49 hydrops fetalis cases (Figure 1).  
97  
98 This study was reviewed by the Stanford University Committee for the Protection of Human  
99 Subjects and determined to be Exempt from oversight.

## 100 101 **Conclusions**

102  
103 This study demonstrates that parvovirus B19 DNA can be quantified in wastewater and directly  
104 correlated to clinical indicators of infection. This demonstrates the potential for wastewater to  
105 provide sentinel surveillance during key early periods of an outbreak, especially in the absence  
106 of mandated public health reporting. Previous studies have shown that parvovirus B19 infects  
107 the intestinal mucosa and is present in the sputum of infected patients, indicating it could be  
108 shed into wastewater.<sup>12</sup> Related viruses, such as human bocaviruses, have shown to be shed in  
109 stool samples.<sup>13</sup> Recent studies, such as Li et al., have identified parvovirus B19 (often referred  
110 to as erythroparvovirus), in wastewater samples through shotgun sequencing and metagenomic  
111 analysis.<sup>14,15</sup> To our knowledge, ours is the first study to directly quantify parvovirus B19 in  
112 wastewater through targeted molecular techniques, and relate the results to clinical case data.

113  
114 Parvovirus B19 DNA concentrations in wastewater at both treatment plants were significantly  
115 correlated with clinical cases of parvovirus B19 in the county. The majority of these diagnosed  
116 cases were in children and adolescents under 16 ( $> 90\%$ ), likely due to the unique symptomatic  
117 presentation in children as a “slapped-cheek” rash and clinical diagnosis without further  
118 molecular diagnostics. We then showed that these concentrations corresponded to an increase  
119 in maternal care for hydrops fetalis, one of the known complications of parvovirus B19 in  
120 pregnant women. This suggests that parvovirus B19 DNA in wastewater is an indicator of not  
121 only infections in children, but infections in the adult population, for which clinical data is highly  
122 limited. As a result, wastewater represents a rapid and cost-effective method of providing real-  
123 time information on parvovirus B19 outbreaks in populations. This is especially important  
124 because children are no longer viremic by the time the characteristic rash appears. Early  
125 increases in wastewater detection of viremia could then lead to mitigation strategies such as  
126 warning or screening pregnant women and those who are immunocompromised.

127  
128 **Acknowledgments.** We thank the participating wastewater treatment plants for their samples  
129 for the project. Data used in this study came from Epic Cosmos, a dataset created in  
130 collaboration with a community of Epic health systems representing more than 284 million  
131 patient records from over 1,500 hospitals and 36,000 clinics from all 50 states, D.C., Lebanon,  
132 and Saudi Arabia.

133

134  
135

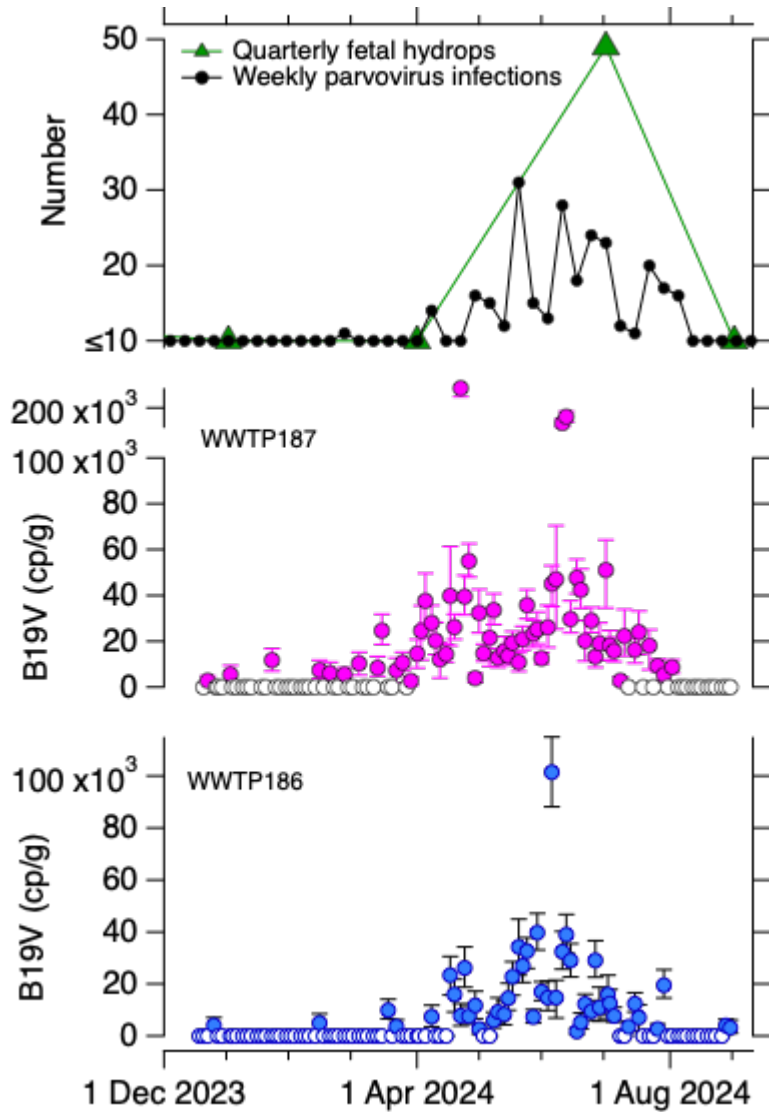

136

137 Figure 1. Concentrations of parvovirus B19 (B19V) DNA in wastewater solids in units of copies  
138 per gram dry weight at the two indicated WWTP (bottom two panels) and the number of  
139 confirmed parvovirus infections and fetal hydrops logged into EPIC for the county where the  
140 WWTPs are located (top panel). Open circles in the bottom two panels indicate that B19V was  
141 not detected while solid circles indicate it was detected. Error bars represent standard  
142 deviations. Note the broken y-axis in the middle panel. For the case and syndromic data,  
143 numbers less than or equal to 10 is redacted and reported as  $\leq 10$ . Data on fetal hydrops are

144 provided quarterly; parvovirus infection data are provided weekly. Kendall's taus between  
145 weekly cases and wastewater concentrations were 0.56 and 0.52, respectively ( $p < 0.0001$ ).  
146  
147

- 148 (1) *Detection of Increased Activity of Human Parvovirus B19 Using Commercial Laboratory*  
149 *Testing of Clinical Samples and Source Plasma Donor Pools — United States, 2024 |*  
150 *MMWR*. <https://www.cdc.gov/mmwr/volumes/73/wr/mm7347a2.htm> (accessed 2024-12-  
151 06).
- 152 (2) Heegaard, E. D.; Brown, K. E. Human Parvovirus B19. *Clinical Microbiology Reviews*  
153 **2002**, *15* (3), 485–505. <https://doi.org/10.1128/cmr.15.3.485-505.2002>.
- 154 (3) Qiu, J.; Söderlund-Venermo, M.; Young, N. S. Human Parvoviruses. *Clinical Microbiology*  
155 *Reviews* **2016**, *30* (1), 43–113. <https://doi.org/10.1128/cmr.00040-16>.
- 156 (4) Nordholm, A. C.; Møller, F. T.; Ravn, S. F.; Sørensen, L. F.; Moltke-Prehn, A.; Mollerup, J.  
157 E.; Funk, T.; Sperling, L.; Jeyaratnam, U.; Franck, K. T.; Hjort-Pedersen, K.; Kamper, C.  
158 H.; Nielsen, R. T.; Jokelainen, P.; Wessman, M. Epidemic of Parvovirus B19 and Disease  
159 Severity in Pregnant People, Denmark, January to March 2024. *Eurosurveillance* **2024**, *29*  
160 (24), 2400299. <https://doi.org/10.2807/1560-7917.ES.2024.29.24.2400299>.
- 161 (5) Young, N. S.; Brown, K. E. Parvovirus B19. *New England Journal of Medicine* **2004**, *350*  
162 (6), 586–597. <https://doi.org/10.1056/NEJMra030840>.
- 163 (6) *Health Alert Network (HAN) - 00514 | Increase in Human Parvovirus B19 Activity in the*  
164 *United States*. <https://emergency.cdc.gov/han/2024/han00514.asp> (accessed 2024-11-29).
- 165 (7) Goncalves, G.; Dias, M. Parvovirus Outbreak in a Kindergarten in a Municipality in the  
166 North of Portugal, April-June 2008. *Euro Surveill* **2008**, *13* (48), 19053.
- 167 (8) Dittmer, F. P.; Guimarães, C. de M.; Peixoto, A. B.; Pontes, K. F. M.; Bonasoni, M. P.;  
168 Tonni, G.; Araujo Júnior, E. Parvovirus B19 Infection and Pregnancy: Review of the  
169 Current Knowledge. *Journal of Personalized Medicine* **2024**, *14* (2), 139.  
170 <https://doi.org/10.3390/jpm14020139>.
- 171 (9) Boehm, A. B.; Wolfe, M. K.; Bidwell, A. L.; Zulli, A.; Chan-Herur, V.; White, B. J.; Shelden,  
172 B.; Duong, D. Human Pathogen Nucleic Acids in Wastewater Solids from 191 Wastewater  
173 Treatment Plants in the United States. *Scientific Data* **2024**, *11* (1), 1141.  
174 <https://doi.org/10.1038/s41597-024-03969-8>.
- 175 (10) Kaplan, E. H.; Zulli, A.; Sanchez, M.; Peccia, J. Scaling SARS-CoV-2 Wastewater  
176 Concentrations to Population Estimates of Infection. *Sci Rep* **2022**, *12* (1), 3487.  
177 <https://doi.org/10.1038/s41598-022-07523-7>.
- 178 (11) ICD-10 : International Statistical Classification of Diseases and Related Health Problems :  
179 Tenth Revision, 2004, Spanish version, 1st edition published by PAHO as Publicación  
180 Científica 544.
- 181 (12) Pironi, L.; Bonvicini, F.; Gionchetti, P.; D’Errico, A.; Rizzello, F.; Corsini, C.; Foroni, L.;  
182 Gallinella, G. Parvovirus B19 Infection Localized in the Intestinal Mucosa and Associated  
183 with Severe Inflammatory Bowel Disease. *Journal of Clinical Microbiology* **2009**, *47* (5),  
184 1591–1595. <https://doi.org/10.1128/jcm.00706-08>.
- 185 (13) Blinkova, O.; Rosario, K.; Li, L.; Kapoor, A.; Slikas, B.; Bernardin, F.; Breitbart, M.; Delwart,  
186 E. Frequent Detection of Highly Diverse Variants of Cardiovirus, Cosavirus, Bocavirus, and  
187 Circovirus in Sewage Samples Collected in the United States. *J Clin Microbiol* **2009**, *47*  
188 (11), 3507–3513. <https://doi.org/10.1128/JCM.01062-09>.
- 189 (14) McCall, C.; Wu, H.; Miyani, B.; Xagorarakis, I. Identification of Multiple Potential Viral  
190 Diseases in a Large Urban Center Using Wastewater Surveillance. *Water Research* **2020**,  
191 *184*, 116160. <https://doi.org/10.1016/j.watres.2020.116160>.
- 192 (15) Li, Y.; Miyani, B.; Faust, R. A.; David, R. E.; Xagorarakis, I. A Broad Wastewater Screening  
193 and Clinical Data Surveillance for Virus-Related Diseases in the Metropolitan Detroit Area  
194 in Michigan. *Hum Genomics* **2024**, *18* (1), 14. <https://doi.org/10.1186/s40246-024-00581-0>.
